# Supplementary material for: Prevalence and Nature of Financial Considerations Documented in Narrative Clinical Records in Intensive Care Units
Source: PubMed Central journal article supplement (PMC6324587; doi:10.1001/jamanetworkopen.2018.4178), 2018-11-02
Supplement: jamanetwopen-1-e184178-s001.pdf [file jamanetwopen-1-e184178-s001.pdf]

## Supplementary Online Content

Gordon DD, Patel I, Pellegrini AM, Perlis RH. Prevalence and nature of financial considerations documented in narrative clinical records in intensive care units. *JAMA Netw Open*. 2018;1(7):e184178. doi:10.1001/jamanetworkopen.2018.4178

**eTable 1.** Prevalence of Financial Notes as a Proportion of Patients and Individual Notes

**eTable 2.** Sociodemographic and Clinical Features Associated With Presence of Financial Notes Reflecting Medication Change

**eTable 3.** Sociodemographic and Clinical Features Associated With Presence of Financial Notes Addressing Treatment Plan Change

**eTable 4.** Sociodemographic and Clinical Features Associated With Presence of Financial Notes Addressing Discharge Plan Change

This supplementary material has been provided by the authors to give readers additional information about their work.

eTable 1. Prevalence of financial notes as a proportion of patients and individual notes

|                                                                                                                                        | <b>Index admissions = patients (% of patients)</b> | <b>All admissions (% of admissions)</b> | <b>All notes (% of notes)</b> |
|----------------------------------------------------------------------------------------------------------------------------------------|----------------------------------------------------|-----------------------------------------|-------------------------------|
| Total N                                                                                                                                | 46,146                                             | 58,362                                  | 2,083,180                     |
| Financial*                                                                                                                             | 1,936 (4.20%)                                      | 1,994 (3.42%)                           | 3,492 (0.17%)                 |
| Change in Discharge                                                                                                                    | 142 (0.31%)                                        | 142 (0.24%)                             | 197 (0.01%)                   |
| Change in Treatment                                                                                                                    | 142 (0.31%)                                        | 144 (0.25%)                             | 182 (0.01%)                   |
| Medication-related                                                                                                                     | 303 (0.66%)                                        | 312 (0.53%)                             | 486 (0.02%)                   |
|                                                                                                                                        |                                                    |                                         |                               |
| * subcategories of financial notes do not sum to total, as financial notes need not be labeled as belonging to one of these categories |                                                    |                                         |                               |

eTable 2. Sociodemographic and clinical features associated with presence of financial notes reflecting medication change

| <b>Feature</b>            | <b>1+ Financial/medication-related note</b> | <b>No Financial/medication-related note</b> |                    |                |
|---------------------------|---------------------------------------------|---------------------------------------------|--------------------|----------------|
|                           | <b>Mean (SD)</b>                            | <b>Mean (SD)</b>                            | <b>Student's T</b> | <b>P-Value</b> |
| Age (years)               | 47.41 (25.2)                                | 47.90 (32.2)                                | 0.31               | 0.76           |
| Length of stay (days)     | 16.97 (25.5)                                | 9.64 (12.4)                                 | 4.73               | <0.001         |
|                           | <b>n (%)</b>                                | <b>n (%)</b>                                | <b>Chi Square</b>  | <b>P-Value</b> |
| Sex (Female)              | 141 (46.5%)                                 | 20090 (43.8%)                               | 0.79               | 0.374          |
| <b>Race/Ethnicity</b>     |                                             |                                             |                    |                |
| White                     | 193 (61.9%)                                 | 40293 (69.8%)                               | 8.85               | 0.003**        |
| Black/African American    | 51 (16.3%)                                  | 5211 (9.0%)                                 | 19.3               | <0.001         |
| Unknown/Not Specified     | 17 (5.4%)                                   | 4465 (7.7%)                                 | 1.96               | 0.161          |
| Hispanic or Latino        | 17 (5.4%)                                   | 1647 (2.9%)                                 | 6.61               | 0.010*         |
| Asian                     | 6 (1.9%)                                    | 1445 (2.5%)                                 | 0.22               | 0.637          |
| Other                     | 7 (2.2%)                                    | 1481 (2.6%)                                 | 0.03               | 0.858          |
| <b>Insurance</b>          |                                             |                                             |                    |                |
| Private                   | 101 (32.4%)                                 | 22111 (38.3%)                               | 4.36               | 0.037*         |
| Medicare                  | 107 (34.3%)                                 | 27775 (48.1%)                               | 23.15              | <0.001         |
| Medicaid                  | 61 (19.6%)                                  | 5560 (9.6%)                                 | 33.81              | <0.001         |
| Government                | 34 (10.9%)                                  | 1703 (2.9%)                                 | 64.83              | <0.001         |
| Self-Pay                  | 8 (2.6%)                                    | 593 (1.0%)                                  | 5.74               | 0.017*         |
| <b>Marital Status</b>     |                                             |                                             |                    |                |
| Single                    | 110 (35.3%)                                 | 12877 (22.3%)                               | 29.25              | <0.001         |
| Married                   | 92 (29.5%)                                  | 23896 (41.4%)                               | 17.63              | <0.001         |
| Divorced                  | 22 (7.1%)                                   | 3144 (5.4%)                                 | 1.26               | 0.262          |
| Widowed                   | 30 (9.9%)                                   | 7097 (12.3%)                                | 1.82               | 0.177          |
| <b>Language</b>           |                                             |                                             |                    |                |
| English                   | 189 (60.6%)                                 | 28358 (49.1%)                               | 15.87              | <0.001         |
| Spanish                   | 13 (4.2%)                                   | 1042 (1.8%)                                 | 8.43               | 0.004**        |
| <b>Admission Type</b>     |                                             |                                             |                    |                |
| Emergency                 | 257 (82.4%)                                 | 41246 (71.4%)                               | 17.69              | <0.001         |
| Newborn                   | 40 (12.8%)                                  | 7602 (13.2%)                                | 0.01               | 0.924          |
| Elective                  | 9 (2.9%)                                    | 7566 (13.1%)                                | 27.67              | <0.001         |
| Urgent                    | 5 (1.6%)                                    | 1326 (2.3%)                                 | 0.39               | 0.531          |
| <b>Discharge Location</b> |                                             |                                             |                    |                |

|                                          |             |               |       |         |
|------------------------------------------|-------------|---------------|-------|---------|
| Home                                     | 118 (37.8%) | 18377 (31.8%) | 4.87  | 0.027*  |
| Home Health Care                         | 103 (33.0%) | 13765 (23.8%) | 13.87 | <0.001  |
| Rehabilitation/Distinct<br>Part Hospital | 17 (5.4%)   | 6377 (11.0%)  | 9.35  | 0.002** |
| Short-Term Hospital                      | 5 (1.6%)    | 1522 (2.6%)   | 0.92  | 0.337   |
| Skilled Nursing Facility                 | 27 (8.7%)   | 7635 (13.2%)  | 5.26  | 0.022*  |
| Long-Term Care Hospital                  | 12 (3.8%)   | 2267 (3.9%)   | 0.01  | 0.941   |
| Died in Hospital                         | 9 (2.9%)    | 5615 (9.7%)   | 15.82 | <0.001  |

eTable 3. Sociodemographic and clinical features associated with presence of financial notes addressing treatment plan change

| <b>Feature</b>            | <b>1+ Financial/treatment-related note</b> | <b>No Financial/treatment-related note</b> |                    |                |
|---------------------------|--------------------------------------------|--------------------------------------------|--------------------|----------------|
|                           | <b>Mean (SD)</b>                           | <b>Mean (SD)</b>                           | <b>Student's T</b> | <b>P-Value</b> |
| Age (years)               | 55.13 (20.4)                               | 47.85 (32.2)                               | 5.11               | <0.001         |
| Length of stay (days)     | 13.47 (16.6)                               | 9.66 (12.5)                                | 3.47               | 0.001          |
|                           | <b>n (%)</b>                               | <b>n (%)</b>                               | <b>Chi square</b>  | <b>P-Value</b> |
| Sex (Female)              | 67 (47.2%)                                 | 20164 (43.8%)                              | 0.52               | 0.472          |
| <b>Race/Ethnicity</b>     |                                            |                                            |                    |                |
| White                     | 88 (61.1%)                                 | 40458 (69.6%)                              | 4.52               | 0.034          |
| Black/African American    | 17 (11.8%)                                 | 5366 (9.2%)                                | 0.85               | 0.357          |
| Unknown/Not Specified     | 6 (4.2%)                                   | 4476 (7.7%)                                | 2.05               | 0.152          |
| Hispanic or Latino        | 9 (6.2%)                                   | 1668 (2.9%)                                | 4.72               | 0.030*         |
| Asian                     | 5 (3.5%)                                   | 1443 (2.5%)                                | 0.24               | 0.622          |
| Other                     | 4 (2.8%)                                   | 1487 (2.6%)                                | 0.01               | 0.922          |
| <b>Insurance</b>          |                                            |                                            |                    |                |
| Private                   | 44 (30.6%)                                 | 22201 (38.2%)                              | 3.24               | 0.072          |
| Medicare                  | 50 (34.7%)                                 | 27911 (48.0%)                              | 9.66               | 0.002**        |
| Medicaid                  | 32 (22.2%)                                 | 5662 (9.7%)                                | 23.97              | <0.001         |
| Government                | 13 (9.0%)                                  | 1741 (3.0%)                                | 15.89              | <0.001         |
| Self-Pay                  | 4 (2.8%)                                   | 599 (1.0%)                                 | 2.74               | 0.098          |
| <b>Marital Status</b>     |                                            |                                            |                    |                |
| Single                    | 56 (38.9%)                                 | 13051 (22.5%)                              | 21.31              | <0.001         |
| Married                   | 49 (34.0%)                                 | 23965 (41.2%)                              | 2.79               | 0.095          |
| Divorced                  | 10 (6.9%)                                  | 3182 (5.5%)                                | 0.35               | 0.555          |
| Widowed                   | 17 (11.8%)                                 | 7139 (12.3%)                               | 0                  | 0.962          |
| <b>Language</b>           |                                            |                                            |                    |                |
| English                   | 104 (72.2%)                                | 28605 (49.2%)                              | 29.49              | <0.001         |
| Spanish                   | 6 (4.2%)                                   | 1059 (1.8%)                                | 3.19               | 0.074          |
| <b>Admission Type</b>     |                                            |                                            |                    |                |
| Emergency                 | 121 (84.0%)                                | 41576 (71.5%)                              | 10.4               | 0.001**        |
| Newborn                   | 5 (3.5%)                                   | 7641 (13.1%)                               | 10.96              | 0.001***       |
| Elective                  | 14 (9.7%)                                  | 7567 (13.0%)                               | 1.1                | 0.293          |
| Urgent                    | 3 (2.1%)                                   | 1329 (2.3%)                                | 0.01               | 0.908          |
| <b>Discharge Location</b> |                                            |                                            |                    |                |

|                                          |            |               |      |         |
|------------------------------------------|------------|---------------|------|---------|
| Home                                     | 57 (39.6%) | 18520 (31.9%) | 3.59 | 0.058   |
| Home Health Care                         | 47 (32.6%) | 13869 (23.9%) | 5.61 | 0.018*  |
| Rehabilitation/Distinct<br>Part Hospital | 4 (2.8%)   | 6407 (11.0%)  | 9.15 | 0.002** |
| Short-Term Hospital                      | 1 (0.7%)   | 1533 (2.6%)   | 1.43 | 0.232   |
| Skilled Nursing Facility                 | 12 (8.3%)  | 7674 (13.2%)  | 2.57 | 0.109   |
| Long-Term Care Hospital                  | 4 (2.8%)   | 2287 (3.9%)   | 0.25 | 0.618   |
| Died in Hospital                         | 6 (4.2%)   | 5623 (9.7%)   | 4.38 | 0.036*  |

| eTable 4. Sociodemographic and clinical features associated with presence of financial notes addressing discharge plan change |                                     |                                     |             |         |
|-------------------------------------------------------------------------------------------------------------------------------|-------------------------------------|-------------------------------------|-------------|---------|
| Feature                                                                                                                       | 1+ Financial/discharge-related note | No Financial/discharge-related note |             | P-Value |
|                                                                                                                               | Mean (SD)                           | Mean (SD)                           | Student's T |         |
| Age (years)                                                                                                                   | 48.46 (23.1)                        | 47.86 (32.2)                        | 1.93        | 0.056   |
| Length of stay (days)                                                                                                         | 27.17 (32.2)                        | 9.63 (12.4)                         | 8.3         | <0.001  |
|                                                                                                                               | n (%)                               | n (%)                               | Chi square  |         |
| Sex (Female)                                                                                                                  | 42 (29.6%)                          | 20189 (43.9%)                       | 11.2        | <0.001  |
| <b>Race/Ethnicity</b>                                                                                                         |                                     |                                     |             |         |
| White                                                                                                                         | 94 (66.2%)                          | 40447 (69.6%)                       | 0.63        | 0.426   |
| Black/African American                                                                                                        | 13 (9.9%)                           | 5361 (9.2%)                         | 0.01        | 0.908   |
| Unknown/Not Specified                                                                                                         | 6 (4.9%)                            | 4473 (7.7%)                         | 1.94        | 0.163   |
| Hispanic or Latino                                                                                                            | 3 (2.1%)                            | 1672 (2.9%)                         | 0.09        | 0.769   |
| Asian                                                                                                                         | 6 (4.2%)                            | 1442 (2.5%)                         | 1.13        | 0.288   |
| Other                                                                                                                         | 2 (1.4%)                            | 1486 (2.6%)                         | 0.36        | 0.548   |
| <b>Insurance</b>                                                                                                              |                                     |                                     |             |         |
| Private                                                                                                                       | 55 (39.4%)                          | 22179 (38.2%)                       | 0           | 0.961   |
| Medicare                                                                                                                      | 25 (17.6%)                          | 27936 (48.1%)                       | 51.52       | <0.001  |
| Medicaid                                                                                                                      | 37 (26.1%)                          | 5649 (9.7%)                         | 41.05       | <0.001  |
| Government                                                                                                                    | 15 (10.6%)                          | 1737 (3.0%)                         | 25.31       | <0.001  |
| Self-Pay                                                                                                                      | 9 (6.3%)                            | 592 (1.0%)                          | 34.2        | <0.001  |
| <b>Marital Status</b>                                                                                                         |                                     |                                     |             |         |
| Single                                                                                                                        | 57 (40.1%)                          | 13062 (22.5%)                       | 24.3        | <0.001  |
| Married                                                                                                                       | 46 (32.4%)                          | 23953 (41.2%)                       | 4.21        | 0.040*  |
| Divorced                                                                                                                      | 6 (4.9%)                            | 3178 (5.5%)                         | 0.22        | 0.64    |
| Widowed                                                                                                                       | 10 (7.0%)                           | 7134 (12.3%)                        | 3.14        | 0.076   |
| <b>Language</b>                                                                                                               |                                     |                                     |             |         |
| English                                                                                                                       | 75 (52.8%)                          | 28625 (49.3%)                       | 0.58        | 0.448   |
| Spanish                                                                                                                       | 5 (3.5%)                            | 1059 (1.8%)                         | 1.43        | 0.232   |
| <b>Admission Type</b>                                                                                                         |                                     |                                     |             |         |
| Emergency                                                                                                                     | 119 (83.8%)                         | 41555 (71.5%)                       | 9.89        | 0.002** |
| Newborn                                                                                                                       | 13 (9.2%)                           | 7634 (13.1%)                        | 1.64        | 0.2     |
| Elective                                                                                                                      | 6 (4.2%)                            | 7576 (13.0%)                        | 8.96        | 0.003** |
| Urgent                                                                                                                        | 4 (2.8%)                            | 1328 (2.3%)                         | 0.02        | 0.887   |
| <b>Discharge Location</b>                                                                                                     |                                     |                                     |             |         |
| Home                                                                                                                          | 44 (31.0%)                          | 18531 (31.9%)                       | 0.02        | 0.886   |

|                                          |            |               |       |        |
|------------------------------------------|------------|---------------|-------|--------|
| Home Health Care                         | 23 (16.2%) | 13895 (23.9%) | 4.23  | 0.040* |
| Rehabilitation/Distinct<br>Part Hospital | 33 (23.2%) | 6363 (11.0%)  | 20.63 | <0.001 |
| Short-Term Hospital                      | 6 (4.9%)   | 1526 (2.6%)   | 0.86  | 0.354  |
| Skilled Nursing Facility                 | 11 (7.7%)  | 7669 (13.2%)  | 3.22  | 0.073  |
| Long-Term Care<br>Hospital               | 10 (7.0%)  | 2276 (3.9%)   | 2.89  | 0.089  |
| Died in Hospital                         | 5 (3.5%)   | 5627 (9.7%)   | 5.48  | 0.019* |
